# Supplementary material for: Surface modification via self-assembling large cations for improved performance and modulated hysteresis of perovskite solar cells
Source: Royal Society of Chemistry journal article supplement (doi:10.1039/c8ta12284a), 2019-01-01
Supplement: c8ta12284a1.pdf [file c8ta12284a1.pdf]

## Supporting Information

### **Surface Modification via Self-Assembling Large Cation for Improved Performance and Modulated Hysteresis of Perovskite Solar Cells**

Tongle Bu <sup>a, c</sup>, Jing Li <sup>a</sup>, Wenchao Huang <sup>b\*</sup>, Wenxin Mao <sup>c</sup>, Fei Zheng <sup>d</sup>, Pengqing Bi <sup>d</sup>, Xiaotao Hao <sup>d</sup>, Jie Zhong <sup>a\*</sup>, Yi-Bing Cheng <sup>a, b, c</sup> and Fuzhi Huang <sup>a\*</sup>

<sup>a</sup>State Key Laboratory of Advanced Technology for Materials Synthesis and Processing, Wuhan University of Technology, Wuhan 430070, P. R. China

<sup>b</sup>Department of Materials Science and Engineering, Monash University, Clayton VIC 3800, Australia

<sup>c</sup>Department of Chemical Engineering, Monash University, Clayton VIC 3800, Australia

<sup>d</sup>School of Physics, State Key Lab of Crystal Materials, Shandong University, Jinan 250100, China

<sup>e</sup>ARC Centre of Excellence in Exciton Science, Monash University, Clayton VIC 3800, Australia

\*Corresponding Email: fuzhi.huang@whut.edu.cn; wenchao.huang@monash.edu; jie.zhong@whut.edu.cn

#### **Experimental section**

##### **Materials**

Unless specified, otherwise all chemicals were purchased from Alfa Aesar or Sigma-Aldrich and used as received. SnCl<sub>2</sub>•2H<sub>2</sub>O was purchased from Aladdin. Formamidinium iodide (FAI) and methylammonium bromine (MABr) were purchased from Lumtec, Taiwan. Lead iodide (PbI<sub>2</sub>) and lead bromine (PbBr<sub>2</sub>) were purchased from TCI. Phenyl-C61-butyric acid methyl ester (PCBM), n-Butylammonium (BA), tert-butylammonium (tBAI) and Spiro-OMeTAD were purchased from Xi'an Polymer Light Technology Corp.

##### **Preparation of the perovskite precursors.**

The CsFAMA mixed perovskite precursor was prepared by dissolving 1.4 M mixture of metal leadsalts which were composed of 0.85 PbI<sub>2</sub> and 0.15 PbBr<sub>2</sub>, and 1.3 M organic cation which were composed of 0.85 FAI and 0.15 MABr in the mixture solvent of DMF/DMSO (4:1, by volume), and added 34 μL CsI (pre-dissolved as a 2 M stock solution in DMSO) to achieve the desired Cs<sub>0.05</sub>(FA<sub>0.85</sub>MA<sub>0.15</sub>)<sub>0.95</sub>Pb(I<sub>0.85</sub>Br<sub>0.15</sub>)<sub>3</sub> perovskite solution with proper excess lead halide.

##### **Device fabrication**

FTO glass was etched by a laser machine (Universal Laser Systems, VLS2.30), and followed by ultrasonic cleaning through detergent, pure water and ethyl alcohol for 20 min, respectively. They were then dried with dry-air gas flow and then treated by plasma for 5 min. The compact SnO<sub>2</sub> film was achieved by chemical bath deposition (CBD). 5g urea was dissolved into 400mL deionized water, followed by the addition of 100 μL mercaptoacetic acid and 5 ml HCl (37 wt%). Finally, SnCl<sub>2</sub>•2H<sub>2</sub>O was dissolved in the solution at 0.012 M and then stored in fridge for 3 days before use. The as cleaned FTO glass was soaked into the diluted SnCl<sub>2</sub>•2H<sub>2</sub>O solution (0.002M) for 2 hours at 70 °C and then washed by deionized water and dried by gas gun blowing. The CBD process was repeated for 3 times to achieve the desired thickness, followed by annealing at 180°C for 1 hour. After cooling down, a 30 uL PCBM/ chlorobenzene (10 mg/mL) solution was spun onto the SnO<sub>2</sub> substrates, and followed by sintered at 70 °C for 5 min. The perovskite absorber was deposited on the UV-processed SnO<sub>2</sub> substrates (UV illuminated for 15 min) by spun a 25 μL mixed perovskite solution at 6000 rpm for 30 s with an acceleration speed of 1000 rpm, and 100 μL anti-solvents of ethyl acetate was dropped at the last 5<sup>th</sup> second. The films were then annealed at 120 °C for 45 min, and after cooling down, a 30 uL different concentration of tBAI/ isopropanol solution was spun onto the perovskite films and followed by a sintering for 5 min at 100 °C. After cooling down, a 25 μL Spiro-OMeTAD solution, dissolving 73mg Spiro-OMeTAD into 1 mL chlorobenzene followed by the addition of 18 μL Li-TFSI (pre-dissolved as a 520mg/mL stock solution in acetonitrile) and 29 μL FK209 (pre-dissolved as a 300mg/mL stock solution in acetonitrile) and 30 μL 4-tert-butylpyridine was spun on the corresponding mixed perovskite films at 3000 rpm for 30 s. Finally, a 60 nm of gold was evaporated on the top of Spiro-OMeTAD as the back electrode to complete the whole device.

## **Characterizations**

The surface morphologies and microstructures of the perovskite films and cross-sectional structure of the perovskite solar cells were investigated using a field-emission scanning electron microscopy (FESEM, Zeiss Ultra Plus). The different perovskite films were tested by an X-ray diffractometer (XRD, D8 Advance), UV-vis (lambda 750S, PerkinElmer). Grazing-incidence wide-angle X-ray scattering (GIWAXS) was performed at BL16B1 beamline of Shanghai Synchrotron Radiation Facility. The wavelength of incident X-ray was 0.124 nm and sample-to-detector distance was 283

mm. The incidence light angle was  $0.12^\circ$  and mar165CCD was used to collect the scattering signal. All the samples used for GIWAXS measurements were prepared in the same condition with the device fabrication. The steady-state photoluminescence (PL) spectra were obtained using a PL microscopic spectrometer (Flex One, Zolix, China); The time-resolved photoluminescence (TRPL) was measured at 770 nm using excitation with a 478nm light pulse from Delta Flex Fluorescence Lifetime System (Horiba Scientific Com., Japan). The EIS measurements were carried out by an EC-lab (SP300). The photocurrent density-voltage curves of the perovskite solar cells were measured using a solar simulator (Oriel 94023A, 300 W) and a Keithley 2400 source meter. The intensity ( $100 \text{ mW/cm}^2$ ) was calibrated using a standard Si solar cell (Oriel, VLSI standards). All the devices were tested under AM 1.5G sun light ( $100 \text{ mW/cm}^2$ ) using a metal mask of  $0.16 \text{ cm}^2$  with a scan rate of  $10 \text{ mV/s}$ .

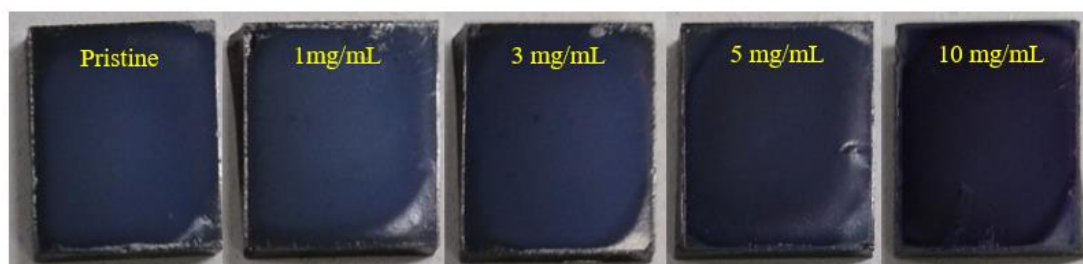

**Fig. S1** The photograph of different concentration of tBAI/ IPA solution treated perovskite films.

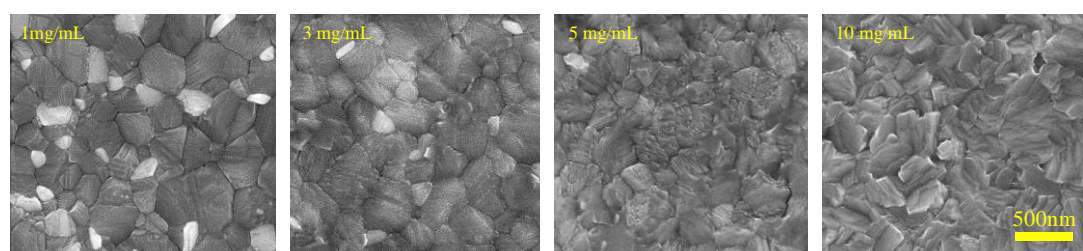

**Fig. S2** The SEM images of different concentration of BAI/ IPA solution treated perovskite films.

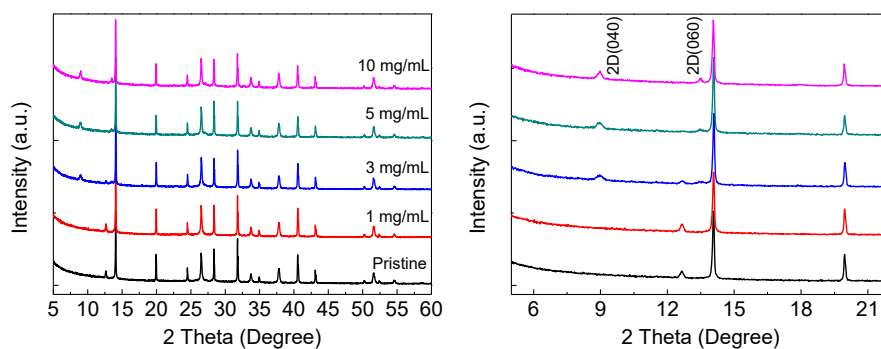

**Fig. S3** XRD pattern of different concentration of BAI/ IPA solution treated perovskite films.

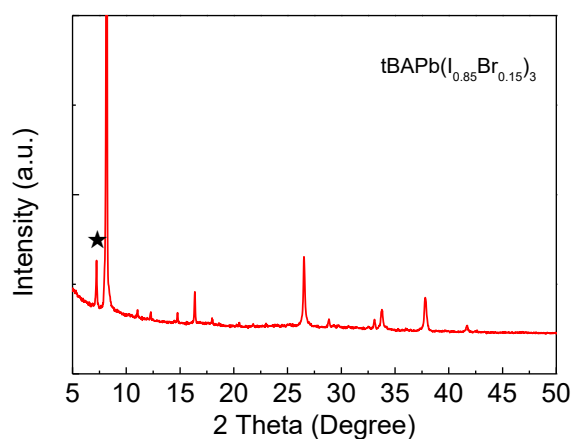

**Fig. S4** XRD of tBA based 1D perovskite films.

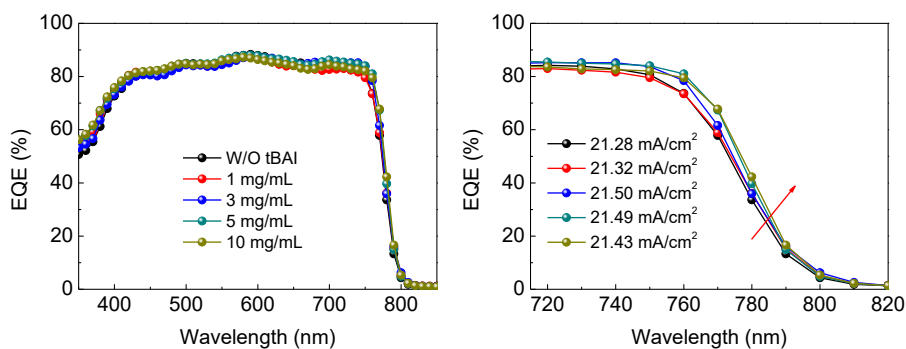

**Fig. S5** EQE spectra of different concentration of tBAI/ IPA solution treated perovskite based solar devices.

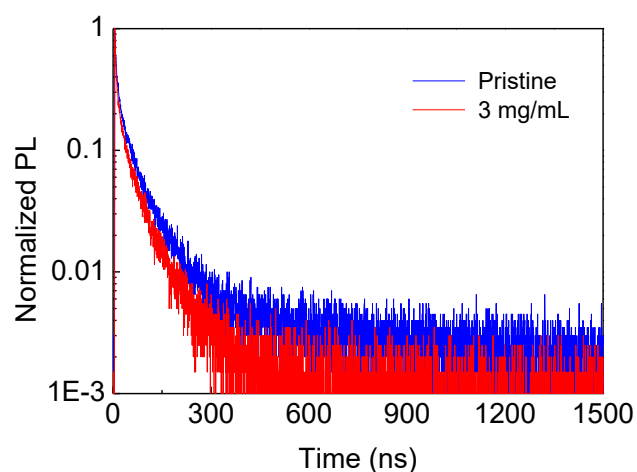

**Fig. S6** Normalized TRPL spectra of pristine perovskite and 3mg/mL tBAI treated perovskite films with Spiro-OMeTAD layer.

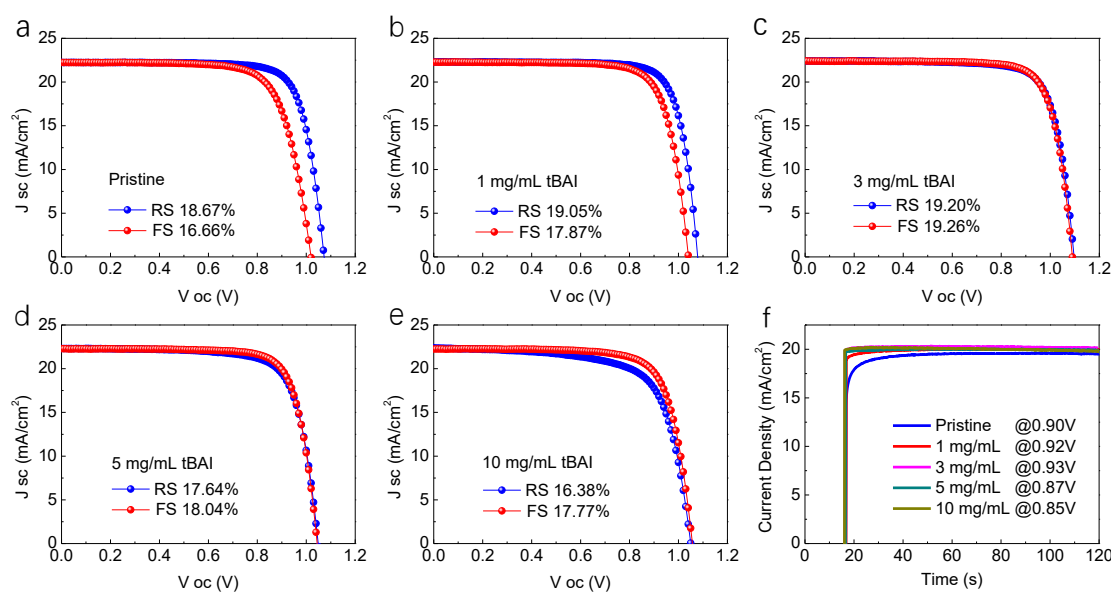

**Fig. S7** The typical  $J$ - $V$  curves of PSCs with different concentration of tBAI/IPA solution treatment. (a) 0 mg/mL, (b) 1 mg/mL, (c) 3 mg/mL, (d) 5 mg/mL, (e) 10 mg/mL and (f) the corresponding steady state output current density under maximum power point.

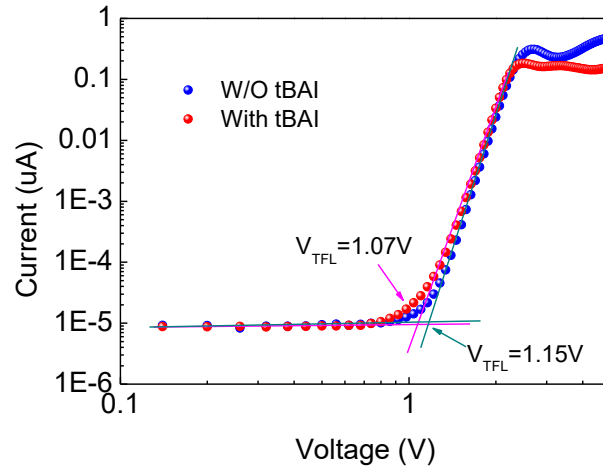

**Fig. S8** Dark  $J$ - $V$  characteristics of electron-only devices with and without tBAI treatment.

**Table S1.** The average parameters derived from the  $J$ - $V$  curves of PSCs with different concentration of tBAI/ IPA solution treatment.

| tBAI (mg/mL) | sweep | $V_{oc}$ (V) | $J_{sc}$ (mA/cm <sup>2</sup> ) | FF          | PCE (%)    |
|--------------|-------|--------------|--------------------------------|-------------|------------|
| 0            | RS    | 1.069±0.011  | 22.04±0.15                     | 0.771±0.011 | 18.37±0.26 |
|              | FS    | 1.019±0.032  | 22.03±0.17                     | 0.690±0.031 | 15.58±0.65 |
| 1            | RS    | 1.072±0.014  | 22.16±0.16                     | 0.780±0.006 | 18.62±0.41 |
|              | FS    | 1.029±0.018  | 22.16±0.16                     | 0.752±0.015 | 17.09±0.62 |
| 3            | RS    | 1.089±0.015  | 22.33±0.31                     | 0.777±0.010 | 18.92±0.53 |
|              | FS    | 1.083±0.016  | 22.32±0.32                     | 0.782±0.011 | 18.93±0.44 |
| 5            | RS    | 1.053±0.012  | 22.12±0.34                     | 0.741±0.022 | 17.54±0.55 |
|              | FS    | 1.056±0.033  | 22.12±0.33                     | 0.767±0.014 | 18.07±0.28 |
| 10           | RS    | 1.040±0.021  | 21.90±0.26                     | 0.734±0.034 | 16.92±0.64 |
|              | FS    | 1.044±0.018  | 21.91±0.25                     | 0.764±0.018 | 17.66±0.23 |

**Table S2.** The fitted parameters of perovskite films with different concentration of tBAI/ IPA

solution treatment from TRPL spectra.  $y = A_1 \exp\left(-\frac{t}{\tau_1}\right) + A_2 \exp\left(-\frac{t}{\tau_2}\right)$ ,  $\tau_{eff} = \frac{A_1\tau_1 + A_2\tau_2}{A_1 + A_2}$ .

| Lifetime (ns) | Prinstine | 1 mg/mL | 3 mg/mL | 5 mg/mL | 10 mg/mL |
|---------------|-----------|---------|---------|---------|----------|
| $A_1$         | 0.37      | 0.28    | 0.24    | 0.37    | 0.43     |
| $\tau_1$      | 41.06     | 61.15   | 83.90   | 47.68   | 36.59    |
| $A_2$         | 0.40      | 0.47    | 0.61    | 0.39    | 0.35     |
| $\tau_2$      | 588.12    | 822.46  | 1034.06 | 507.65  | 523.23   |

|                     |        |        |        |        |        |
|---------------------|--------|--------|--------|--------|--------|
| $\tau_{\text{eff}}$ | 250.44 | 403.68 | 650.91 | 215.63 | 198.86 |
|---------------------|--------|--------|--------|--------|--------|

**Table S3.** The fitted parameters of pristine perovskite and 3mg/mL tBAI treated perovskite films with Spiro-OMeTAD from TRPL spectra.  $y = A_1 \exp\left(-\frac{t}{\tau_1}\right) + A_2 \exp\left(-\frac{t}{\tau_2}\right)$ ,  $\tau_{\text{eff}} = \frac{A_1\tau_1 + A_2\tau_2}{A_1 + A_2}$ .

| Lifetime (ns) | $A_1$ | $\tau_1$ | $A_2$ | $\tau_2$ | $\tau_{\text{eff}}$ |
|---------------|-------|----------|-------|----------|---------------------|
| Pristine      | 0.72  | 4.95     | 0.27  | 51.74    | 17.55               |
| 3 mg/mL       | 0.75  | 3.78     | 0.25  | 41.64    | 13.24               |
